# Supplementary material for: Developing a tablet-based brain-computer interface and robotic prototype for upper limb rehabilitation
Source: PeerJ Comput Sci. 2024 Jul 23;10:e2174. doi: 10.7717/peerj-cs.2174 (PMC11323104; doi:10.7717/peerj-cs.2174)
Supplement: Supplemental Information 1 [file peerj-cs-10-2174-s001.xlsx]

## Sheet: Sheet1
Sub No	Gender	Age	Handedness	Partitions					Cross validation		Target 1		Target 2		Training set accuracy	Target 1		Target 2		True Positive	False Positive	Fasle Negative	True Negative	LDA accuracy	Game play duration	Accuracy calculated using formula
				1/5 part	2/5 part	3/5 part	4/5 part	5/5 part	Test accuracy	Sigma	Class 1	Class 2	Class 1	Class 2		Class 1	Class 2	Class 1	Class 2
1	Female	28	Right	65.83	64.81	79.07	67.22	58.51	67.09	6.69	66.7	33.3	32.5	67.5	67.77	66.6	33.4	31.1	68.9	0.68	0.32	0.31	0.69	68.78	8.55	68.5
2	Female	34	Right	36.29	63.7	58.61	59.81	65.27	56.74	10.5	43.7	56.3	30.2	69.8	57.62	40.1	59.9	24.8	75.2	0.43	0.57	0.25	0.75	59.28	5.12	59
3	Female	23	Right	61.2	64.35	61.94	59.35	54.62	60.29	3.25	62.1	37.9	41.6	58.4	62.62	60.3	39.7	35.1	64.9	0.61	0.39	0.35	0.65	63.34	4.43	63
4	Male	39	Right	56.75	40.64	65.64	46.48	59.81	53.87	9.07	48.3	51.7	40.6	59.4	58.74	53.8	46.3	36.3	63.7	0.54	0.46	0.37	0.63	58.08	5.5	58.5
5	Male	39	Right	55.55	55.46	52.87	68.24	67.03	59.83	6.45	62.8	37.2	43.1	56.9	61.05	64	36	41.9	58.1	0.65	0.34	0.43	0.57	61	9.47	61.3065
6	Male	24	Right	62.77	47.96	66.85	54.35	54.44	57.27	6.71	59.8	40.2	45.3	54.7	62.07	64.4	35.6	40.3	59.7	0.65	0.35	0.41	0.59	61.92	7.54	62
7	Female	21	Right	83.42	72.12	73.24	63.7	74.25	73.35	6.27	75.2	24.8	28.5	71.5	74.81	75.8	24.2	26.2	73.8	0.76	0.24	0.26	0.74	75.16	9.32	75
8	Male	24	Right	56.75	71.48	60.27	73.14	73.7	67.07	7.11	72.8	27.2	38.6	61.4	67.4	73	27	38.1	61.9	0.73	0.27	0.39	0.61	66.98	7.08	67
9	Male	39	Right	58.14	58.7	56.66	51.01	55.83	56.07	2.72	58.7	41.3	46.6	53.4	56.68	59.9	40.1	46.6	53.4	0.6	0.4	0.46	0.54	56.88	6.12	57
10	Male	24	Right	61.94	45.64	60.74	60.18	69.25	59.55	7.68	52.9	47.1	33.8	66.2	62.11	57.6	42.4	33.4	66.6	0.58	0.42	0.32	0.68	63.06	7.07	63
11	Female	21	Right	35.74	54.9	60.92	55.37	60.64	53.51	9.24	51.8	48.2	44.8	55.2	59.25	61.7	38.3	43.2	56.8	0.61	0.39	0.43	0.57	58.94	10.13	59
12	Male	27	Right	73.88	53.79	49.72	70.46	76.66	64.9	10.98	76.3	23.7	46.4	53.6	66.38	76	24	43.2	56.8	0.76	0.24	0.43	0.57	66.38	8.53	66.5
		28.5833							60.795						63.0417					0.633333	0.365833	0.3675	0.6325	63.3167
